# Supplementary material for: Core Fucosylation Mediated by the FucT-8 Enzyme Affects TRAIL-Induced Apoptosis and Sensitivity to Chemotherapy in Human SW480 and SW620 Colorectal Cancer Cells
Source: MDPI journal article supplement (doi:10.3390/ijms241511879), 2023-07-25
Supplement: s1 [file s1]

## Supplementary material

**Table S1:** Primer sequences for real-time quantitative PCR (RT-qPCR).

| Gene ID      | Gene name                                 | Accession number | Assay ID      |
|--------------|-------------------------------------------|------------------|---------------|
| <i>FUT8</i>  | Fucosyltransferase 8                      | NM_004480.4      | Hs00189535_m1 |
| <i>GAPDH</i> | Glyceraldehyde-3-phosphate dehydrogenase  | NM_002046        | Hs99999905_m1 |
| <i>ABCB1</i> | ATP binding cassette subfamily B member 1 | NM_000927.4      | Hs00184500_m1 |

## Supplementary Figure S1

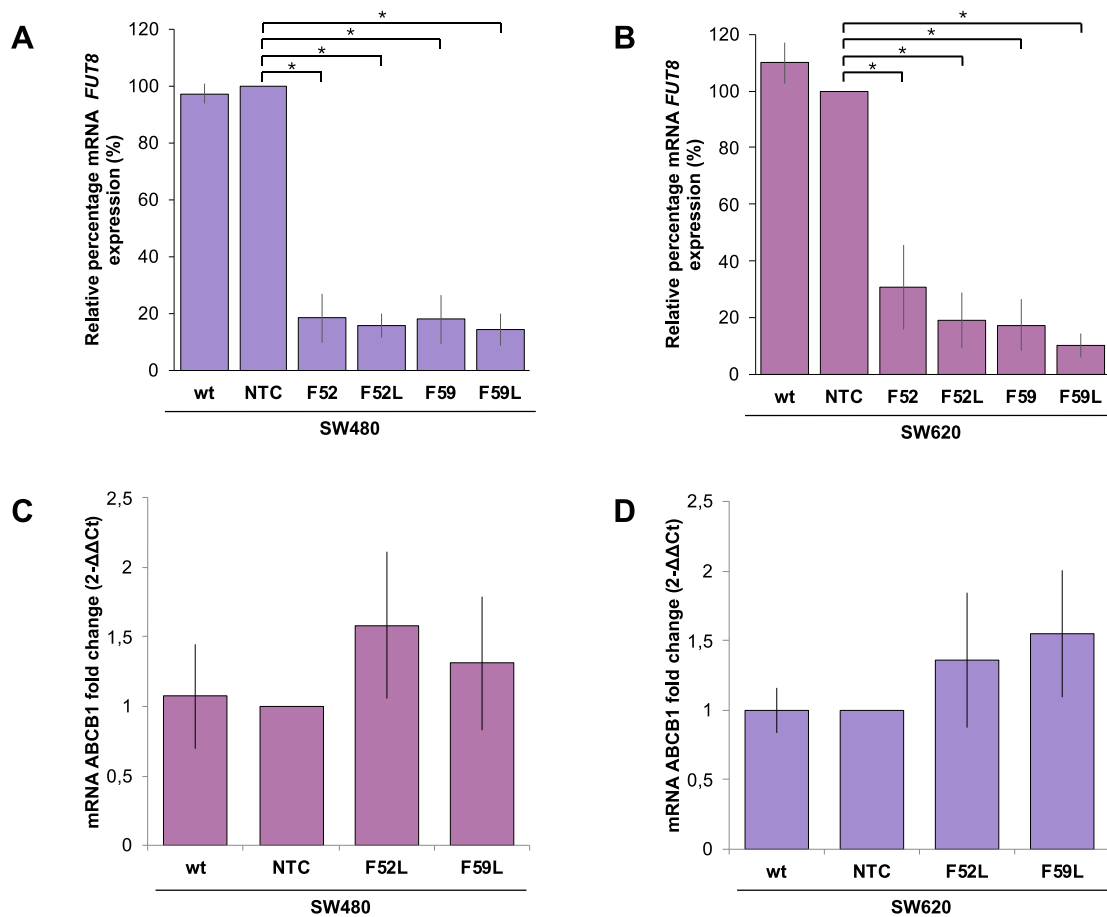

**Figure S1:** Quantification of the mRNA of the *FUT8* gene after selection with LCA (A-B) and of the ATP binding cassette subfamily B member 1 (*ABDCB1*) gene (C-D) in the SW480 and SW620 lines. The mRNA was extracted from growing mid-passage cells and analysed by real-time quantitative PCR (RT-qPCR). *FUT8* and *ABDCB1* mRNAs were quantified relative to that of the housekeeping gene *GAPDH*. Relative expression between cell groups was

determined using the  $2^{-\Delta\Delta Ct}$  fold-change method. Measurements were obtained from three different experiments, and results were plotted as the mean  $\pm$  SD. For statistical calculations, the NTC clone was used as the control cell line. One-way ANOVA test results were significant, and multiple comparisons between the groups were carried out using Fisher's multiple-comparison test. Results were considered significant at (\*)  $p < 0.05$ . wt: wild-type cells; NTC: non-targeted control cells; F52L and F59L: *FUT8*-knockdown clones selected with *Lens culinaris* agglutinin (LCA).

## Supplementary Figure S2

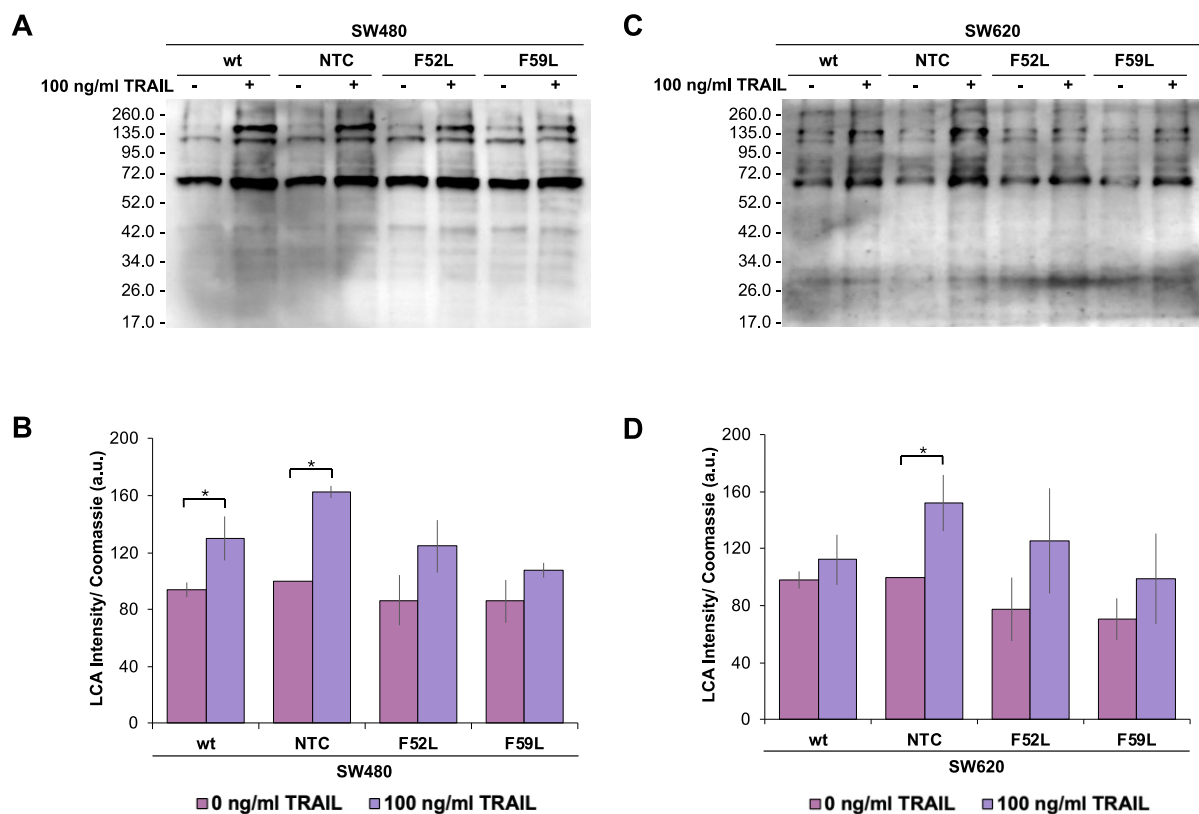

**Figure S2:** Quantification of fucosylated proteins by chemiluminescence using biotinylated *Lens culinaris* agglutinin (LCA) as the detection lectin in SW480 (A,B) and SW620 (C,D) cells. The protein loading control was verified after dyeing the PVDF membranes with Coomassie R-250. Measurements were taken from three different experiments. Results are plotted as the mean  $\pm$  SD. For statistical calculations, NTC clones were used as

reference. The Mann–Whitney U test results were significant at  $p < 0.05$  (\*). wt: wild-type cells; NTC: non-targeted control cells; F52L and F59L: *FUT8*-knockdown clones selected with *Lens culinaris* agglutinin (LCA).

### Supplementary Figure S3

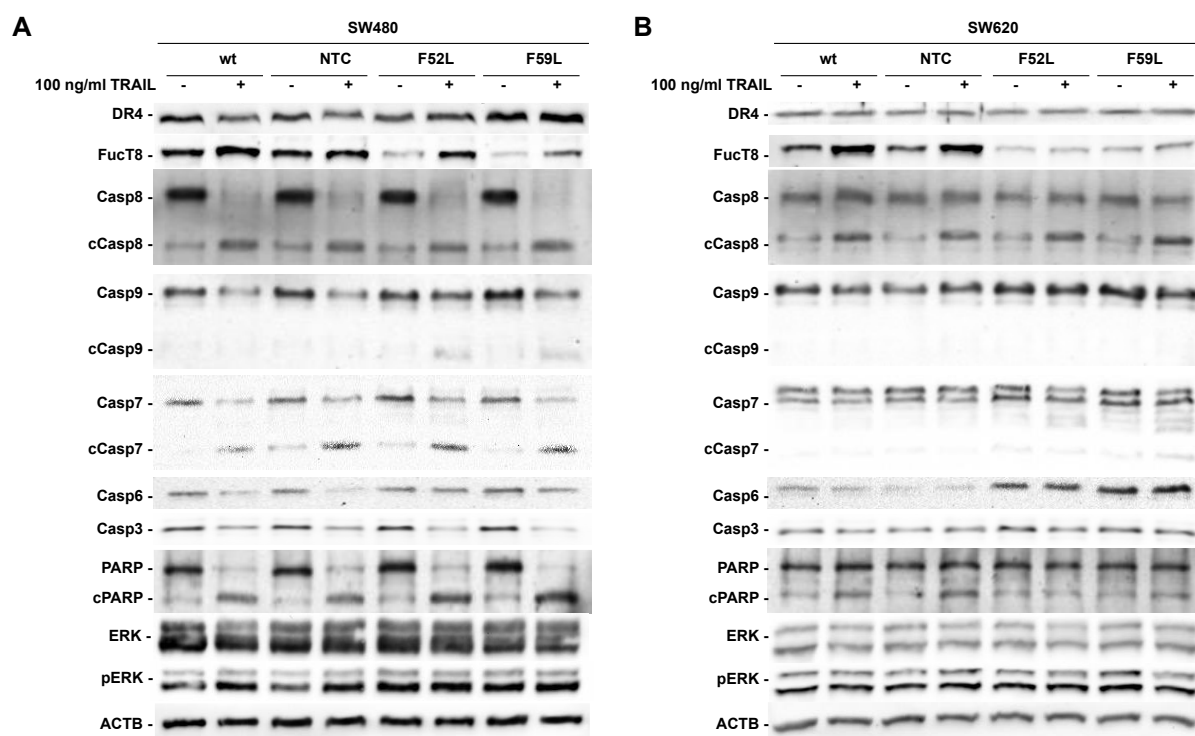

**Figure S3:** Representative immunoblots of DR4, FucT-8, pro-caspase-8 (Casp8), caspase-8 (cCasp8), pro-caspase-9 (Casp9), caspase-9 (cCasp9), pro-caspase-7 (Casp7), caspase-7 (cCasp7), pro-caspase-6 (Casp6), pro-caspase-3 (Casp3), PARP, cleaved PARP (cPARP), total ERK1/2 and phosphorylated ERK1/2 (pERK) in SW480 (A) and SW620 (B) lines. Cells were maintained either in normal medium (-) or in medium supplemented with 100 ng/mL TRAIL for 24 h (+).  $\beta$ -actin expression (ACTB) was used as the protein loading control. wt: wild-type cells; NTC: non-targeted control cells; F52L and F59L: *FUT8*-knockdown clones selected with *Lens culinaris* agglutinin (LCA).
